# Supplementary material for: Repairing boundaries along pathways to tuberculosis case detection: a qualitative synthesis of intervention designs
Source: PubMed Central journal article supplement (PMC8751340; doi:10.1186/s12961-021-00811-0), 2022-01-10
Supplement: 12961_2021_811_MOESM1_ESM.pdf [file 12961_2021_811_MOESM1_ESM.pdf]

### Medline

|    |                                                  |
|----|--------------------------------------------------|
| 1  | tuberculosis [MeSH]                              |
| 2  | tuberculosis [ti, ab ]                           |
| 3  | Mycobacterium tuberculosis [MeSH]                |
| 4  | Case* detection ti, ab                           |
| 5  | Case* finding ti, ab                             |
| 6  | Systematic screening* ti, ab                     |
| 7  | 1 or 2 or 3                                      |
| 8  | 4 or 5 or 6                                      |
| 9  | Diagnos* OR detect* OR screen* OR assess* ti, ab |
| 10 | 7 and 8 and 9                                    |

### Embase

|    |                                                  |
|----|--------------------------------------------------|
| 1  | Tuberculosis [Emtree]                            |
| 2  | Tuberculosis [ti, ab]                            |
| 3  | Mycobacterium tuberculosis [Emtree]              |
| 4  | Case* detection ti, ab                           |
| 5  | Case* finding ti, ab                             |
| 6  | Systematic screening* ti, ab                     |
| 7  | Case finding [Emtree]                            |
| 8  | 1 or 2 or 3                                      |
| 9  | 4 or 5 or 6 or 7                                 |
| 10 | Diagnos* OR detect* OR screen* OR assess* ti, ab |
| 11 | 8 and 9 and 10                                   |

### The Cochrane Library

#1 tuberculosis

#2 MeSH descriptor: [Tuberculosis] explode all trees

#3 MeSH descriptor: [Mycobacterium tuberculosis] explode all trees

#4 #1 or #2 or #3

#5 “case detection” or “case finding” or “systematic screening”

#6 #4 and #5
